# Supplementary material for: Endovascular Treatment of Type A Aortic Dissection: A Systematic Review and Meta-Analysis Using Reconstructed Time-to-Event Data
Source: MDPI journal article supplement (doi:10.3390/jcm12227051), 2023-11-12
Supplement: s1 [file s1]

**Supplemental Figure S1:** Flow diagram in accordance with the PRISMA 2020 guidelines.

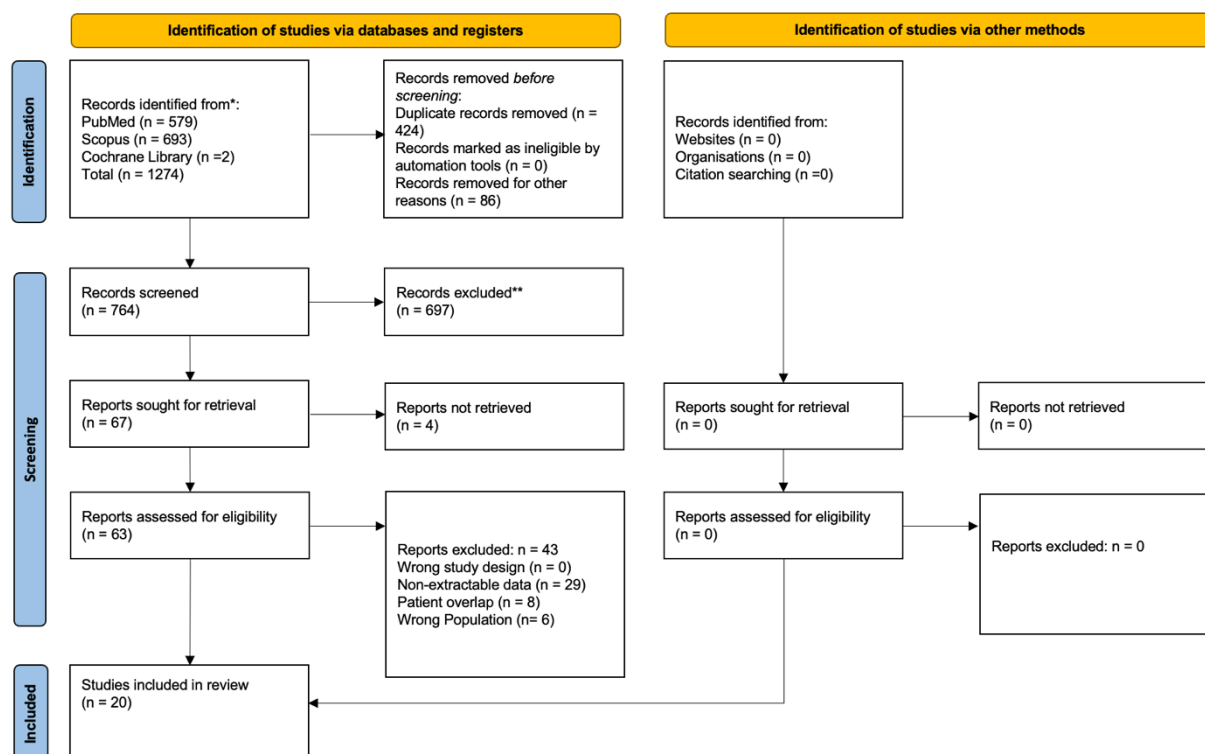

\*Consider, if feasible to do so, reporting the number of records identified from each database or register searched (rather than the total number across all databases/registers).

\*\*If automation tools were used, indicate how many records were excluded by a human and how many were excluded by automation tools.

From: Page MJ, McKenzie JE, Bossuyt PM, Boutron I, Hoffmann TC, Mulrow CD, et al. The PRISMA 2020 statement: an updated guideline for reporting systematic reviews. *BMJ* 2021;372:n71. doi: 10.1136/bmj.n71. For more information, visit: <http://www.prisma-statement.org/>

**Supplemental Figure S2:** Forest Plot diagram demonstrating data for reintervention rates.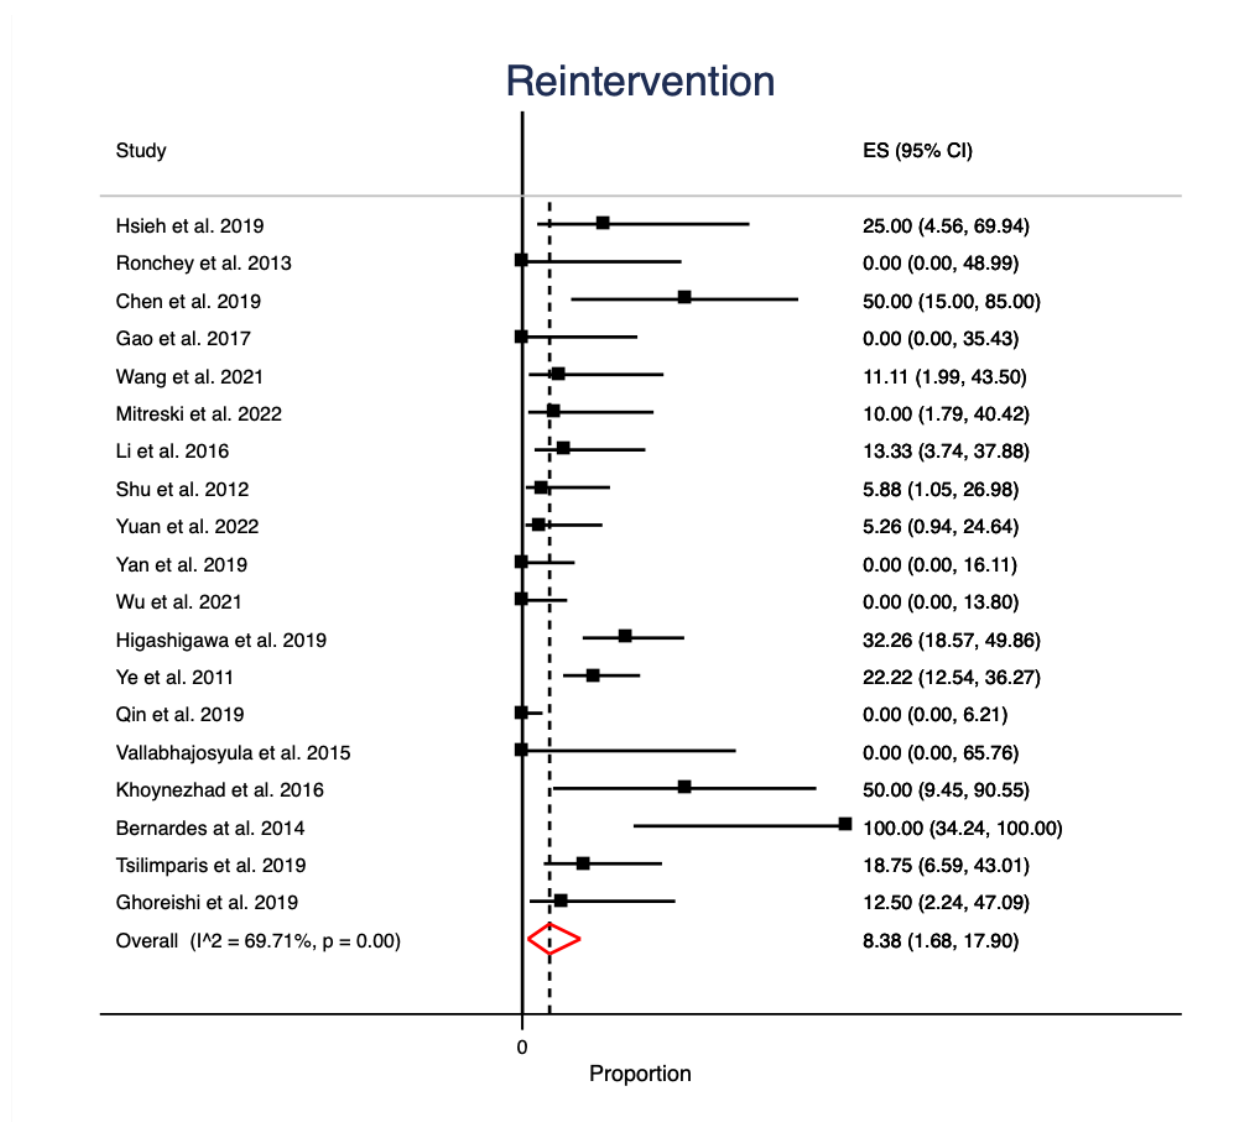

**Supplemental Figure S3:** Forest Plot diagram demonstrating data for early mortality event rates.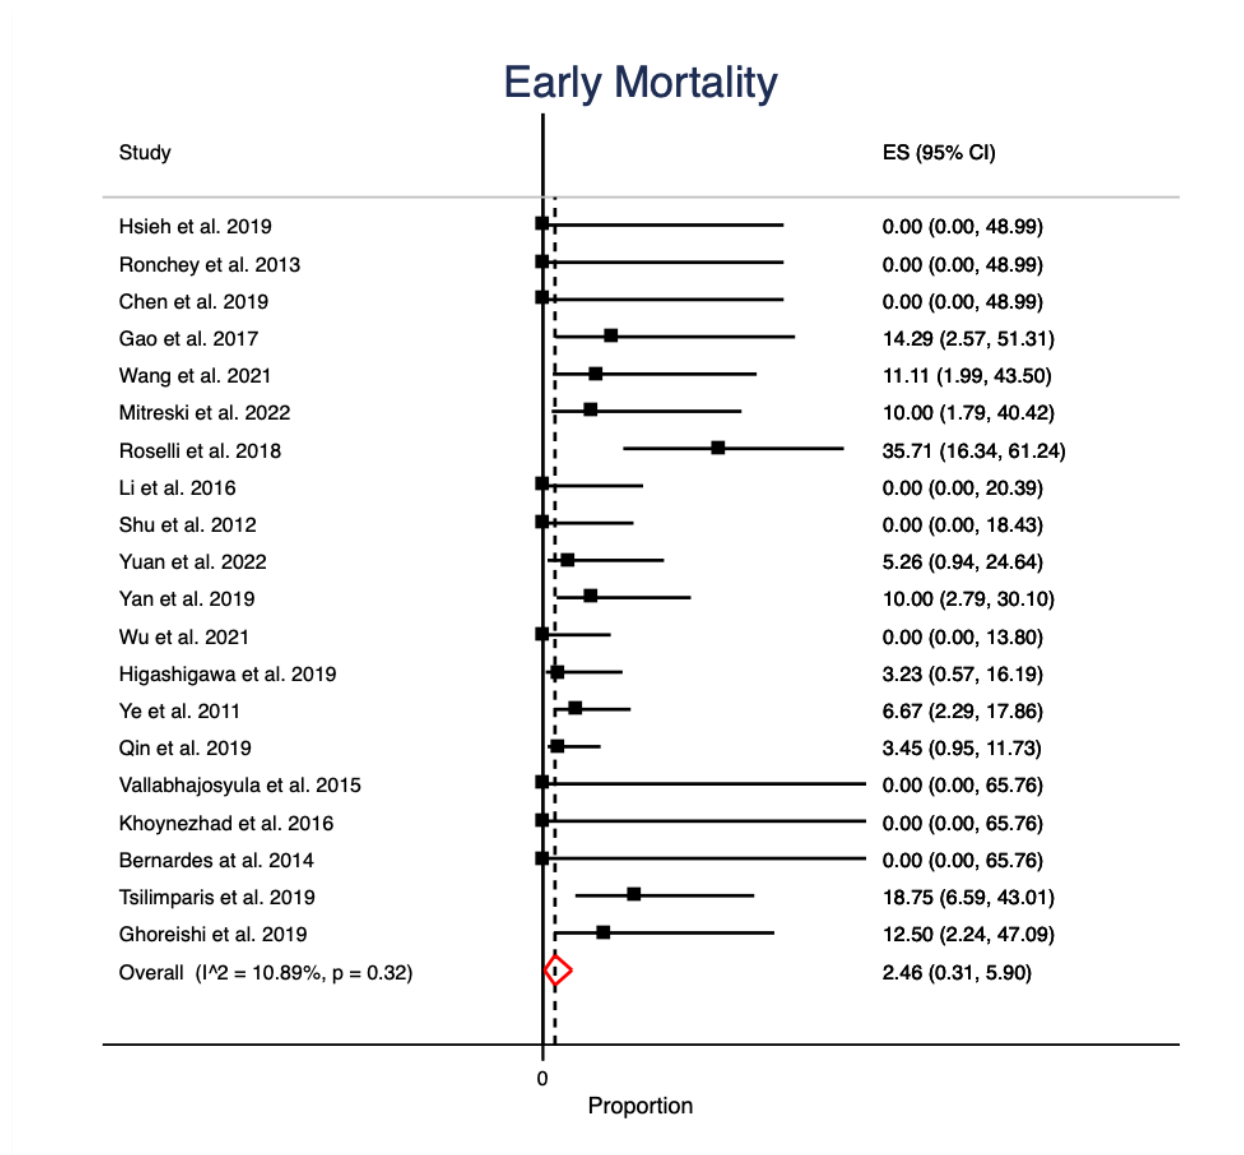

**Supplemental Figure S4:** Forest Plot diagram demonstrating data for late mortality event rates.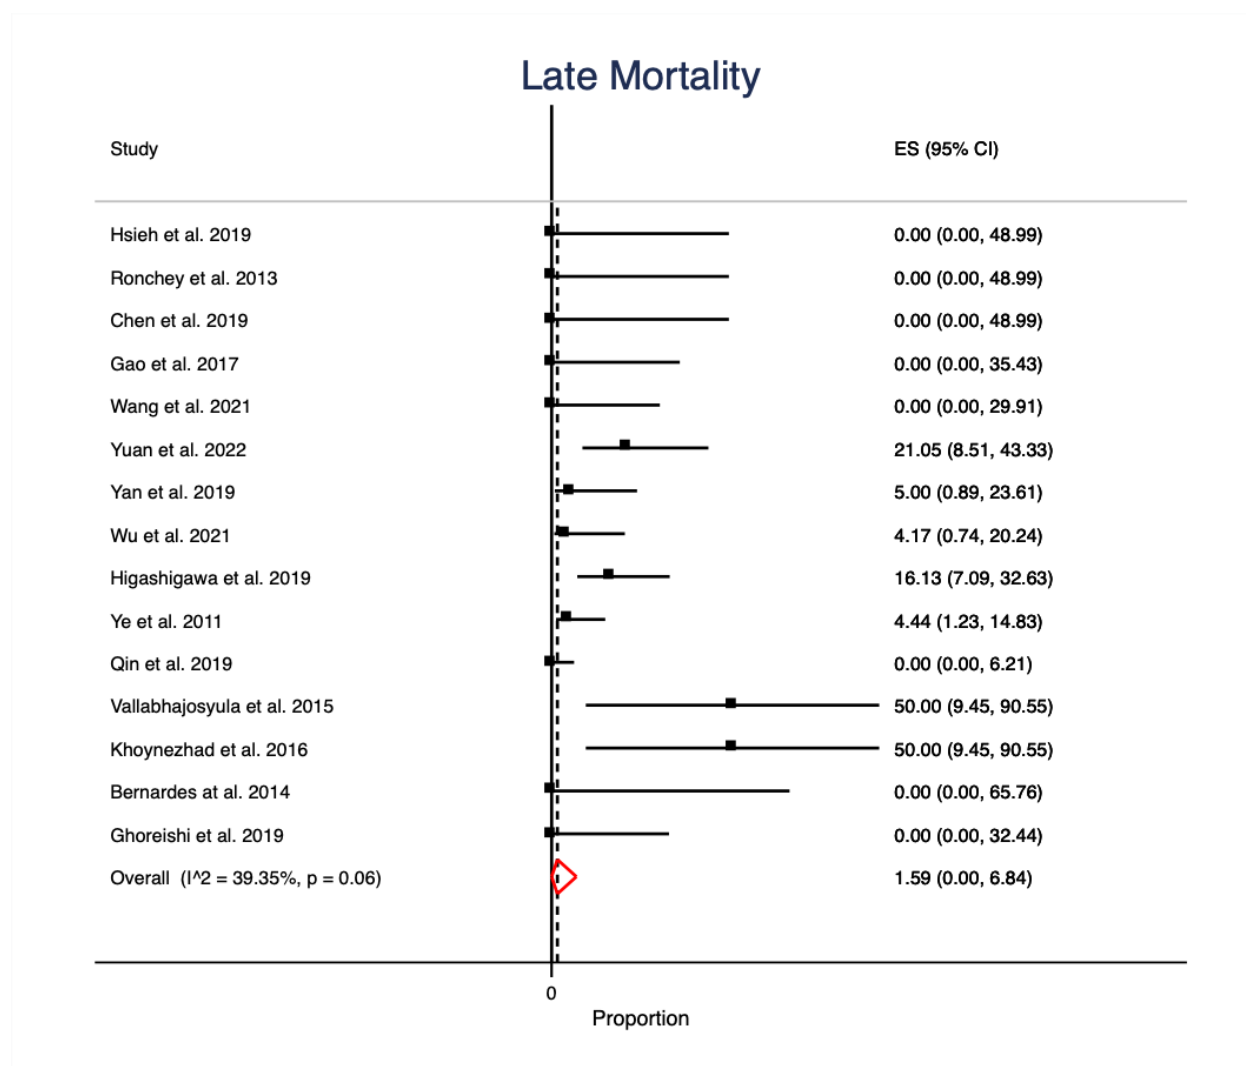

**Supplemental Figure S5:** Provided and Reconstructed Kaplan–Meier curves for observed survival from Higashigawa et al.

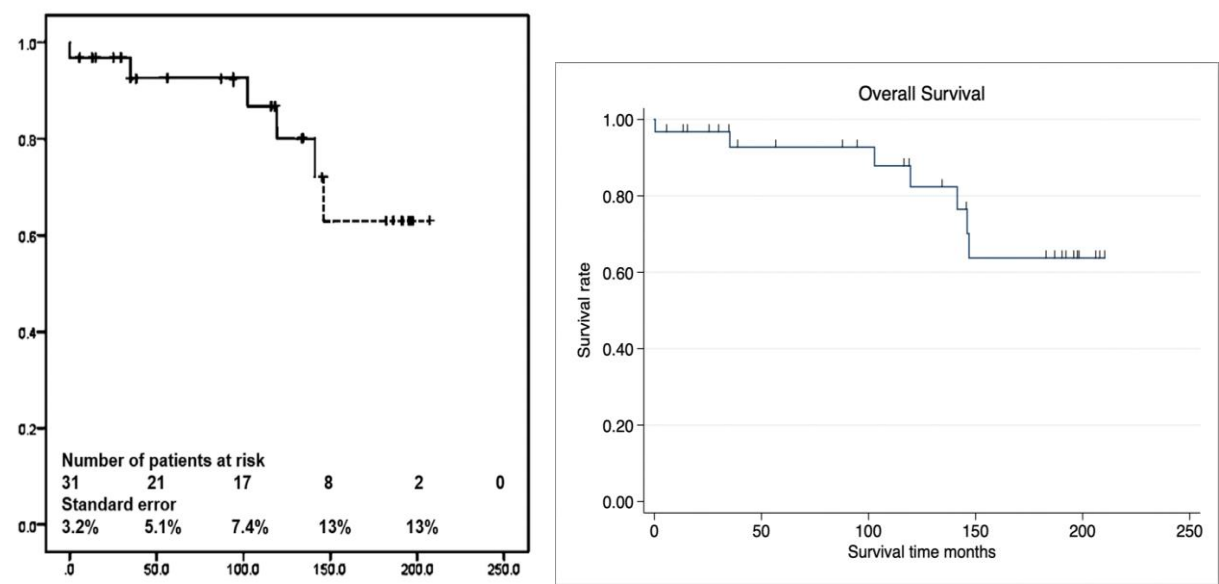

**Supplemental Figure S6:** Provided and Reconstructed Kaplan–Meier curves for observed survival from Yan et al.

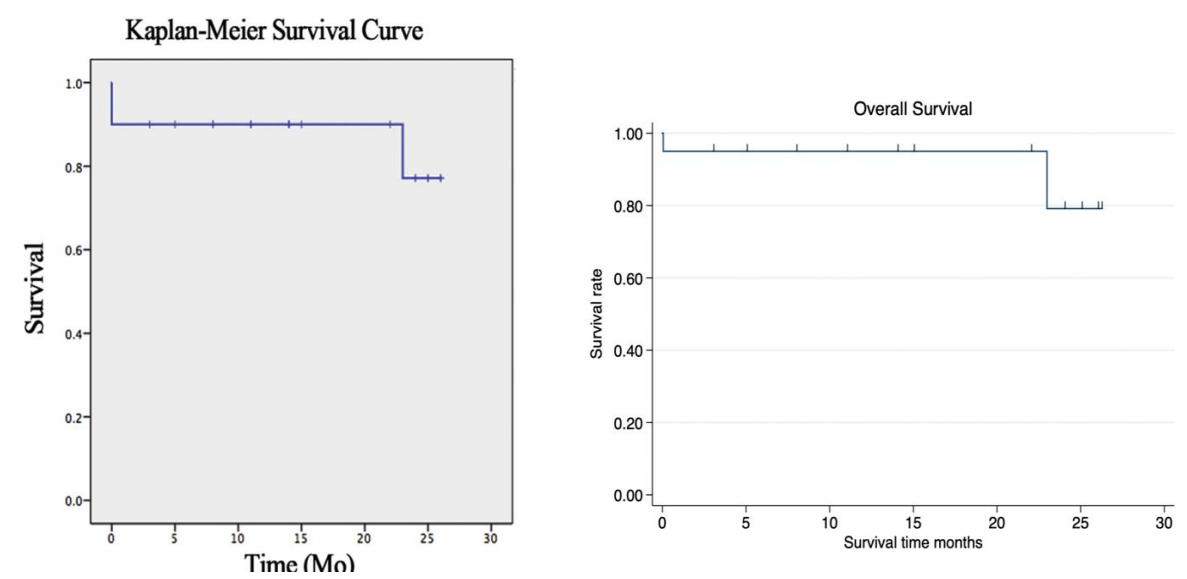

**Supplemental Table S1:** Risk of bias assessment using the NHLBI tool.

| Author                           | Study question or objective clearly stated? | Study population clearly and fully described, including a case definition? | Were the cases consecutive? | Were the subjects comparable? |
|----------------------------------|---------------------------------------------|----------------------------------------------------------------------------|-----------------------------|-------------------------------|
| Hsieh et al. 2019 [29]           | YES                                         | YES                                                                        | YES                         | YES                           |
| Ronchey et al. 2013 [30]         | YES                                         | YES                                                                        | YES                         | YES                           |
| Chen et al. 2019 [31]            | YES                                         | YES                                                                        | YES                         | YES                           |
| Gao et al. 2017 [42]             | YES                                         | YES                                                                        | YES                         | YES                           |
| Wang et al. 2021 [43]            | YES                                         | YES                                                                        | YES                         | YES                           |
| Mitreski et al. 2022 [32]        | YES                                         | YES                                                                        | YES                         | YES                           |
| Roselli et al. 2018 [44]         | YES                                         | YES                                                                        | YES                         | YES                           |
| Li et al. 2016 [33]              | YES                                         | YES                                                                        | YES                         | YES                           |
| Shu et al. 2012 [34]             | YES                                         | YES                                                                        | YES                         | YES                           |
| Yuan et al. 2022 [45]            | YES                                         | YES                                                                        | YES                         | YES                           |
| Yan et al. 2019 [27]             | YES                                         | YES                                                                        | YES                         | YES                           |
| Wu et al. 2021 [35]              | YES                                         | YES                                                                        | YES                         | YES                           |
| Higashigawa et al. 2019 [37]     | YES                                         | YES                                                                        | YES                         | YES                           |
| Ye et al. 2011 [36]              | YES                                         | YES                                                                        | YES                         | YES                           |
| Qin et al. 2019 [26]             | YES                                         | YES                                                                        | YES                         | YES                           |
| Vallabhajosyula et al. 2015 [28] | YES                                         | YES                                                                        | YES                         | YES                           |
| Khoynezhad et al. 2016 [39]      | YES                                         | YES                                                                        | YES                         | YES                           |
| Bernardes et al. 2014 [38]       | YES                                         | YES                                                                        | YES                         | YES                           |
| Tsilimparis et al. 2019 [40]     | YES                                         | YES                                                                        | YES                         | YES                           |
| Ghoreishi et al. 2019 [41]       | YES                                         | YES                                                                        | YES                         | YES                           |
| Abbreviations: NR=Not Reported   |                                             |                                                                            |                             |                               |
|                                  |                                             |                                                                            |                             |                               |
